# Supplementary material
Source: HighWire-hosted journal article supplement (https://gh.bmj.com/content/1/2/e000101)
Supplement: inline-supplementary-material-1 [file inline-supplementary-material-1.pdf]

**Supplemental Table 1** - Linear probability model estimates of the effect of RDT and ACT subsidies on malaria testing behavior, defined as self-report of taking any malaria test and self-report of taking any malaria test with proof of test

|                                                                              | <b>Any test</b>        |                         |                        | <b>Test with proof</b> |                         |                        |
|------------------------------------------------------------------------------|------------------------|-------------------------|------------------------|------------------------|-------------------------|------------------------|
|                                                                              | Unadjusted             | Adjusted (Parsimonious) | Adjusted (Full)        | Unadjusted             | Adjusted (Parsimonious) | Adjusted (Full)        |
| RDT-only Subsidy (Group B vs. Group D)                                       | 21.4%<br>[8.5, 34.2]   | 18.8%<br>[5.9, 31.6]    | 18.6%<br>[5.9, 31.3]   | 23.7%<br>[9.9, 37.4]   | 21.2%<br>[7.5, 34.8]    | 22.6%<br>[9.0, 36.3]   |
| ACT-only Subsidy (Group C vs. Group D)                                       | -2.9%<br>[-16.2, 10.5] | -3.5%<br>[-16.9, 9.9]   | -2.8%<br>[-16.5, 11.0] | -1.1%<br>[-15.0, 12.8] | -2.3%<br>[-16.3, 11.7]  | -0.4%<br>[-14.9, 14.0] |
| RDT Subsidy x ACT Subsidy (Interaction Effect)                               | 3.2%<br>[-14.5, 20.9]  | 5.0%<br>[-12.7, 22.8]   | 5.5%<br>[-12.3, 23.4]  | 2.1%<br>[-16.6, 20.8]  | 4.2%<br>[-14.6, 23.0]   | 2.6%<br>[-16.4, 21.5]  |
| Reference Level                                                              | 52.4%<br>[42.8, 62.1]  | 58.2%<br>[47.8, 68.7]   | 62.0%<br>[32.8, 91.3]  | 47.3%<br>[37.2, 57.5]  | 53.4%<br>[42.3, 64.5]   | 53.2%<br>[21.7, 84.8]  |
| Effect of ACT subsidy in the presence of free testing (Group A vs. Group D)* | 0.35%<br>[-11.3, 12.0] | 1.6%<br>[-10.1, 13.2]   | 2.7%<br>[-8.7, 14.1]   | 1.0%<br>[-11.6, 13.5]  | 1.9%<br>[-10.6, 14.4]   | 2.1%<br>[-10.0, 14.3]  |
| <b>Demographics</b>                                                          |                        |                         |                        |                        |                         |                        |
| Age >5 to <18                                                                |                        |                         | 0.17%<br>[-10.8, 11.1] |                        |                         | -1.7%<br>[-13.3, 9.9]  |
| Age 18 to <35                                                                |                        |                         | -6.8%<br>[-21.4, 07.7] |                        |                         | -7.9%<br>[-22.9, 7.1]  |
| Age 35+                                                                      |                        |                         | 2.0%<br>[-11.4, 15.4]  |                        |                         | 0.6%<br>[-13.6, 14.8]  |
| Female                                                                       |                        |                         | 7.9%<br>[-1.6, 17.4]   |                        |                         | 9.6%<br>[-0.6, 19.7]   |

|                                             |                |     |               |     |               |               |
|---------------------------------------------|----------------|-----|---------------|-----|---------------|---------------|
| Household size                              |                |     | 2.36%         |     |               | 2.1%          |
|                                             |                |     | [-2.0, 6.7]   |     |               | [-2.7, 6.7]   |
| <b>Income, Education and Employment</b>     |                |     |               |     |               |               |
| Wealth: Poorest 40 <sup>th</sup> Percentile | -13.0%         |     | -14.5%        |     | -13.2%        | -14.6%        |
|                                             | [-22.3, -36.5] |     | [-24.1, -4.9] |     | [-22.9, -3.4] | [-24.6, -4.6] |
| Primary education                           |                |     | -1.8%         |     |               | 1.2%          |
|                                             |                |     | [-26.5, 22.9] |     |               | [-25.0, 27.4] |
| Secondary education                         |                |     | -1.1%         |     |               | 1.7%          |
|                                             |                |     | [-26.7, 24.5] |     |               | [-25.3, 28.7] |
| Unemployed/Disabled or Unavailable/Student  |                |     | 4.1%          |     |               | 3.9%          |
|                                             |                |     | [-9.2, 17.4]  |     |               | [-10.3, 18.1] |
| Employed                                    |                |     | 3.44%         |     |               | 3.3%          |
|                                             |                |     | [-11.7, 18.6] |     |               | [-13.2, 19.9] |
| Self-Employed/Other                         |                |     | -11.5%        |     |               | -11.5%        |
|                                             |                |     | [-24.3, 1.3]  |     |               | [-24.8, 1.7]  |
| <b>Other covariates</b>                     |                |     |               |     |               |               |
| CU 2                                        |                |     | -8.6%         |     |               | -7.4%         |
|                                             |                |     | [-20.8, 3.6]  |     |               | [-20.2, 5.5]  |
| CU 3                                        |                |     | -7.3%         |     |               | -7.3%         |
|                                             |                |     | [-18.0, 3.3]  |     |               | [-18.7, 4.1]  |
| Observations                                | 435            | 427 | 427           | 399 | 392           | 392           |

\*All continuous variables standardized
